# Supplementary material
Source: MDPI journal article supplement (https://www.mdpi.com/2410-3888/8/6/289)

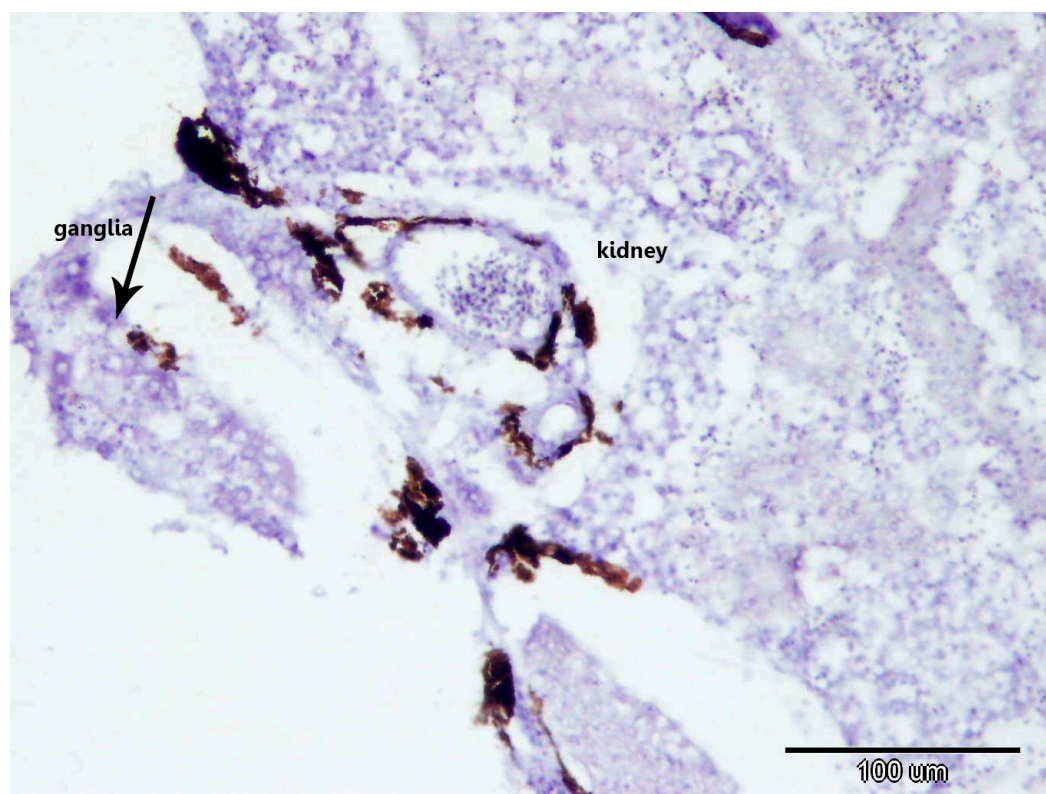

**Figure S1.** Negative control.

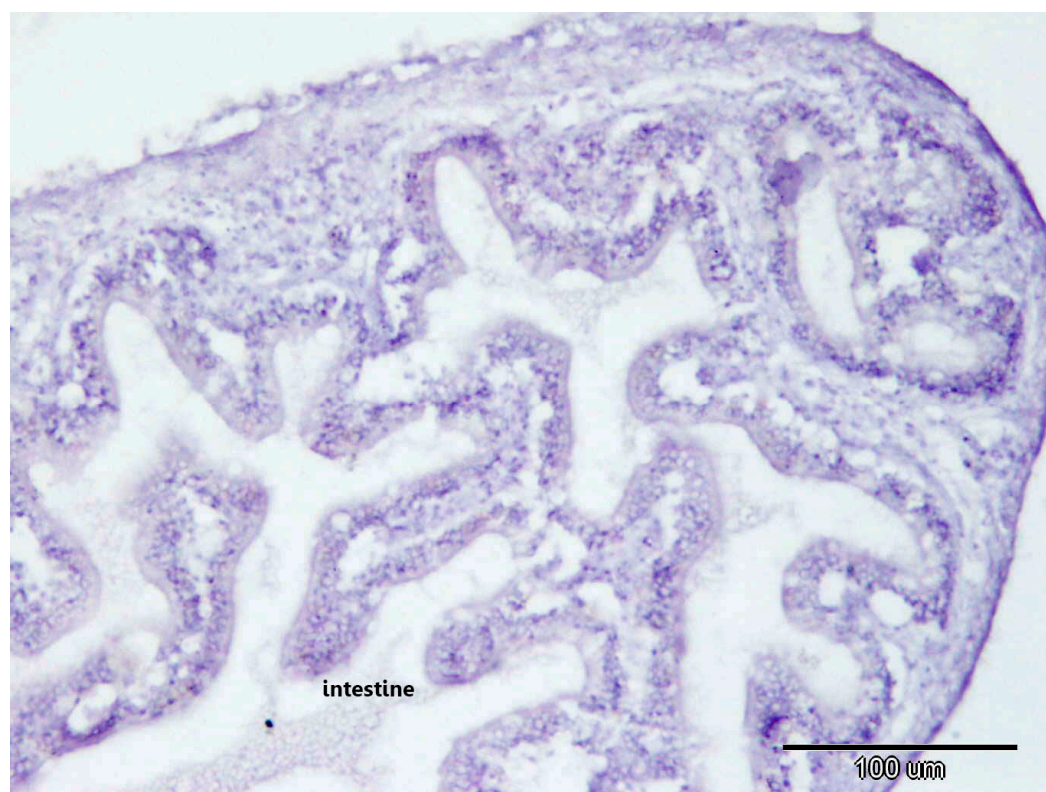

**Figure S2.** Negative control.

Supplement: s1 [file s1]
